# Supplementary material
Source: PubMed Central journal article supplement (PMC6067977)

## Supplemental Tables

**Supplemental Table 1.** Baseline Demographic, Endoscopic, and Histologic Characteristics of Included and Excluded Subjects in the United States Radiofrequency Ablation Cohort.

|                                                     | Full Cohort  | Subjects with Complete Eradication of Intestinal Metaplasia | Included Subjects | Cochran-Mantel-Haenszel/Wilcoxon <i>p</i> for association |
|-----------------------------------------------------|--------------|-------------------------------------------------------------|-------------------|-----------------------------------------------------------|
| N                                                   | 5,521        | 4,087                                                       | 3,105             |                                                           |
| Baseline age in years - mean (SD)                   | 61.6 (11.4)  | 61.2 (11.2)                                                 | 61.5 (10.9)       | 0.32                                                      |
| Male sex - N (percent)                              | 4,052 (73.4) | 2,951 (72.2)                                                | 2,258 (72.7)      | 0.43                                                      |
| Non-dysplastic Barrett's esophagus - N (percent)    | 2,674 (48.3) | 2,050 (50.2)                                                | 1,467 (47.3)      | < 0.0001                                                  |
| Indeterminate for dysplasia - N (percent)           | 406 (7.4)    | 314 (7.7)                                                   | 242 (7.8)         |                                                           |
| Low-grade dysplasia - N (percent)                   | 1,113 (20.2) | 829 (20.3)                                                  | 643 (20.7)        |                                                           |
| High-grade dysplasia - N (percent)                  | 1,054 (19.1) | 749 (18.3)                                                  | 628 (20.2)        |                                                           |
| Intramucosal adenocarcinoma - N (percent)           | 209 (3.8)    | 145 (3.6)                                                   | 125 (4.0)         |                                                           |
| Invasive esophageal adenocarcinoma - N (percent)    | 65 (1.2)     | 0 (0.0)                                                     | 0 (0.0)           |                                                           |
| Baseline segment length in CM - mean (SD)           | 4.1 (3.3)    | 3.7 (3.0)                                                   | 3.7 (3.0)         | < 0.0001                                                  |
| Endoscopic resection before treatment - N (percent) | 495 (9.0)    | 327 (8.0)                                                   | 289 (9.3)         | 0.11                                                      |

SD, standard deviation; N, number; CM, centimeters.

**Supplemental Table 2.** Discrimination Statistics and Model Fit Statistics of the Candidate Models in the Full United States Radiofrequency Ablation Registry, in a Limited Subset of the United States Radiofrequency Ablation Registry with Low-grade Dysplasia or Worse, and in the United Kingdom National Halo Registry in the Forward Selection Model Building Process.

|                                                                     | Full cohort including patients without dysplasia |              |             |               | Limited cohort of patients with at least low-grade dysplasia |              |             |               | External validation in United Kingdom National Halo Registry |             |               |
|---------------------------------------------------------------------|--------------------------------------------------|--------------|-------------|---------------|--------------------------------------------------------------|--------------|-------------|---------------|--------------------------------------------------------------|-------------|---------------|
|                                                                     | AIC                                              | C            | NRI         | IDI           | AIC                                                          | C            | NRI         | IDI           | C                                                            | NRI         | IDI           |
| <i>One variable models</i>                                          |                                                  |              |             |               |                                                              |              |             |               |                                                              |             |               |
| <b>Histologic grade*</b>                                            | <b>1564.7</b>                                    | <b>0.892</b> | <b>1.15</b> | <b>0.0668</b> | <b>1413.0</b>                                                | <b>0.746</b> | <b>0.64</b> | <b>0.0357</b> | <b>0.728</b>                                                 | <b>0.36</b> | <b>0.0062</b> |
| Age                                                                 | 1693.2                                           | 0.672        | -0.15       | -0.0196       | 1430.3                                                       | 0.604        | 0.08        | -0.0154       | 0.470                                                        | 0.14        | 0.0026        |
| Endoscopic mucosal resection                                        | 1700.3                                           | 0.779        | 0.33        | -0.0204       | 1437.6                                                       | 0.592        | 0.09        | -0.0063       | 0.524                                                        | 0.18        | 0.0065        |
| Sex                                                                 | 1714.1                                           | 0.729        | -0.62       | -0.0342       | 1438.4                                                       | 0.594        | †           | -0.0272       | 0.386                                                        | †           | 0.0000        |
| Segment length                                                      | 1721.6                                           | 0.618        | -0.25       | -0.0384       | 1440.3                                                       | 0.487        | †           | -0.0273       | 0.448                                                        | †           | -0.0001       |
| <i>Two variable models</i>                                          |                                                  |              |             |               |                                                              |              |             |               |                                                              |             |               |
| <b>Histologic grade + Age<sup>§</sup></b>                           | <b>1537.2</b>                                    | <b>0.837</b> | <b>0.20</b> | <b>0.0075</b> | <b>1409.4</b>                                                | <b>0.685</b> | <b>0.20</b> | <b>0.0083</b> | <b>0.581</b>                                                 | <b>0.05</b> | <b>0.0007</b> |
| Histologic grade + Endoscopic mucosal resection                     | 1543.0                                           | 0.874        | -0.49       | 0.0020        | 1413.8                                                       | 0.718        | -0.09       | 0.0022        | 0.570                                                        | -0.21       | 0.0031        |
| Histologic grade + Sex                                              | 1542.0                                           | 0.878        | 0.15        | 0.0017        | 1414.2                                                       | 0.719        | -0.07       | 0.0018        | 0.589                                                        | -0.50       | 0.0003        |
| Histologic grade + Segment length                                   | 1544.2                                           | 0.857        | -0.33       | 0.0002        | 1415.0                                                       | 0.691        | -0.55       | 0.0002        | 0.581                                                        | -0.44       | -0.0004       |
| <i>Three variable models (did not reach significance threshold)</i> |                                                  |              |             |               |                                                              |              |             |               |                                                              |             |               |
| Histologic grade + Age + Endoscopic mucosal resection               | 1537.7                                           | 0.839        | 0.34        | 0.0096        | 1409.9                                                       | 0.691        | 0.36        | 0.0105        | 0.566                                                        | -0.18       | 0.0037        |
| Histologic grade + Age + Sex                                        | 1536.8                                           | 0.841        | 0.24        | 0.0088        | 1410.4                                                       | 0.685        | 0.16        | 0.0096        | 0.547                                                        | -0.71       | 0.0017        |
| Histologic grade + Age + Segment length                             | 1539.2                                           | 0.837        | 0.17        | 0.0075        | 1411.3                                                       | 0.684        | 0.18        | 0.0082        | 0.579                                                        | 0.07        | 0.0007        |

AIC, Akaike information criterion; C, C statistic; NRI, net reclassification improvement; IDI, integrated discrimination improvement. \* Model used for surveillance risk categories. † Not estimable. § Model resulting from forward selection process.

**Supplemental Table 3.** Discrimination Statistics Comparing Models Predicting Any Recurrence, Recurrence with Dysplasia as in the Primary Analysis, Recurrence with High-grade Dysplasia or Worse, and Recurrence with Intramucosal Adenocarcinoma.

| Minimum recurrence histologic grade defining the outcome:                               | Non-dysplastic      |                     |                      |                |
|-----------------------------------------------------------------------------------------|---------------------|---------------------|----------------------|----------------|
|                                                                                         | Barrett's esophagus | Low-grade dysplasia | High-grade dysplasia | Adenocarcinoma |
| <i>Discrimination statistics for recurrence with a given histologic grade or worse.</i> |                     |                     |                      |                |
| C statistic of forward selected model                                                   | 0.623               | 0.837               | 0.870                | *              |
| C of model with histologic grade alone                                                  | 0.639               | 0.892               | 0.917                | 0.895          |
| Net reclassification improvement                                                        | -0.14               | 0.20                | 0.38                 | *              |
| Integrated discrimination improvement                                                   | 0.0317              | 0.0072              | 0.0065               | *              |
| <i>Estimated hazard ratio among included parameters in the forward selected model</i>   |                     |                     |                      |                |
| Age in years                                                                            | 1.016               | 1.025               | 1.027                | †              |
| Non-dysplastic intestinal metaplasia                                                    | 1.                  | 1.                  | 1.                   | 1.             |
| Low-grade or indefinite for dysplasia                                                   | 1.348               | 9.372               | 10.170               | 8.391          |
| High-grade dysplasia                                                                    | 1.421               | 24.983              | 46.936               | 21.790         |
| Intramucosal adenocarcinoma                                                             | 1.857               | 33.596              | 81.440               | 78.604         |
| Long segment Barrett's esophagus                                                        | 1.582               | †                   | †                    | †              |

\* The selected model included only histologic grade. † Term was not included in the selected model

**Supplemental Table 4.** Alternative Recommended Time after Complete Eradication Intestinal Metaplasia of Surveillance Visits to Yield 5.7% Neoplastic Recurrence per Visit or 0.2% Invasive Adenocarcinoma for Patients at Higher Risk of Endoscopic Complications.

| Risk Category:                                                 | Visit 1    | Visit 2    | Visit 3 | Visit 4    |
|----------------------------------------------------------------|------------|------------|---------|------------|
| Non-dysplastic Barrett's esophagus or indefinite for dysplasia | > 7 years* | *          | *       | *          |
| Low-grade dysplasia                                            | 3 years    | > 5 years* | *       | *          |
| High-grade dysplasia or adenocarcinoma in situ                 | 1 year     | 2 years    | 3 years | > 5 years* |

\*Surveillance times were estimated to a limit of five years for the higher two risk categories and seven years for the lower to avoid extrapolation beyond the data.

**Supplemental Table 5.** Estimated Proportion of Subjects with Recurrence of Neoplasia Applying the Proposed Surveillance Intervals\* in the United Kingdom National Halo Registry.

| Years after complete eradication of intestinal metaplasia                 | Total proportion with recurrence of neoplasia | Interval proportion with recurrence of neoplasia | Mean interval proportion per visit |
|---------------------------------------------------------------------------|-----------------------------------------------|--------------------------------------------------|------------------------------------|
| <b>Risk group 2: low-grade dysplasia</b>                                  |                                               |                                                  |                                    |
| 1                                                                         | 1.3%                                          | 1.3%                                             | 4.7%                               |
| 3                                                                         | 9.3%                                          | 8.0%                                             |                                    |
| <b>Risk group 3: high-grade dysplasia and intramucosal adenocarcinoma</b> |                                               |                                                  |                                    |
| 0.25                                                                      | 0%                                            | 0%                                               |                                    |
| 0.5                                                                       | 3.6%                                          | 3.6%                                             |                                    |
| 1                                                                         | 6.9%                                          | 3.4%                                             |                                    |
| 2                                                                         | 13.9%                                         | 6.9%                                             | 3.7%                               |
| 3                                                                         | 21.8%                                         | 7.9%                                             |                                    |
| 4                                                                         | 21.8%                                         | 0.0%                                             |                                    |
| 5                                                                         | 25.9%                                         | 4.1%                                             |                                    |

\* Intervals were chosen to yield an estimated 3.6% neoplastic recurrence per visit.

**Supplemental Figure Legend**

| <b>Figure #</b> | <b>Title</b>                                                                                                                                                                                                                                                                                |
|-----------------|---------------------------------------------------------------------------------------------------------------------------------------------------------------------------------------------------------------------------------------------------------------------------------------------|
| Supplemental 1  | Kaplan-Meier Estimates of the Proportion of Subjects in the US RFA Registry without Recurrence of Neoplasia in Five Years after Complete Eradication of Intestinal Metaplasia by Subject Age at First Treatment.                                                                            |
| Supplemental 2  | Kaplan-Meier Estimates of the Proportion of Subjects in the US RFA Registry without Recurrence of Neoplasia in Five Years after Complete Eradication of Intestinal Metaplasia by whether Endoscopic Mucosal Resection was Performed Before Entry into Surveillance.                         |
| Supplemental 3  | Kaplan-Meier Estimates of the Proportion of Subjects in the US RFA Registry without Recurrence of Neoplasia in Five Years after Complete Eradication of Intestinal Metaplasia by Subject Sex.                                                                                               |
| Supplemental 4  | Kaplan-Meier Estimates of the Proportion of Subjects in the US RFA Registry without Recurrence of Neoplasia in Five Years after Complete Eradication of Intestinal Metaplasia by Baseline Barrett's Segment Length.                                                                         |
| Supplemental 5  | Spline Estimate of the Baseline Hazard with Four Degrees of Freedom of the Proportion of Subjects in the US RFA Registry without Recurrence of Neoplasia in Five Years after Complete Eradication of Intestinal Metaplasia by Simplified Categories of Surveillance Risk.                   |
| Supplemental 6  | Various Parameterizations of the Baseline Hazard Function Produce Similar Estimates of the Proportion of Subjects in the US RFA Registry without Recurrence of Neoplasia in Five Years after Complete Eradication of Intestinal Metaplasia among the Highest Category of Surveillance Risk. |
| Supplemental 7  | Sensitivity Analysis with Random Imputation of Neoplastic Recurrence Events at One, Two, and Four Times the Modeled Rate of Recurrence of Neoplasia After Subjects are Censored for Recurrence and Retreatment of Non-dysplastic Barrett's Esophagus.                                       |

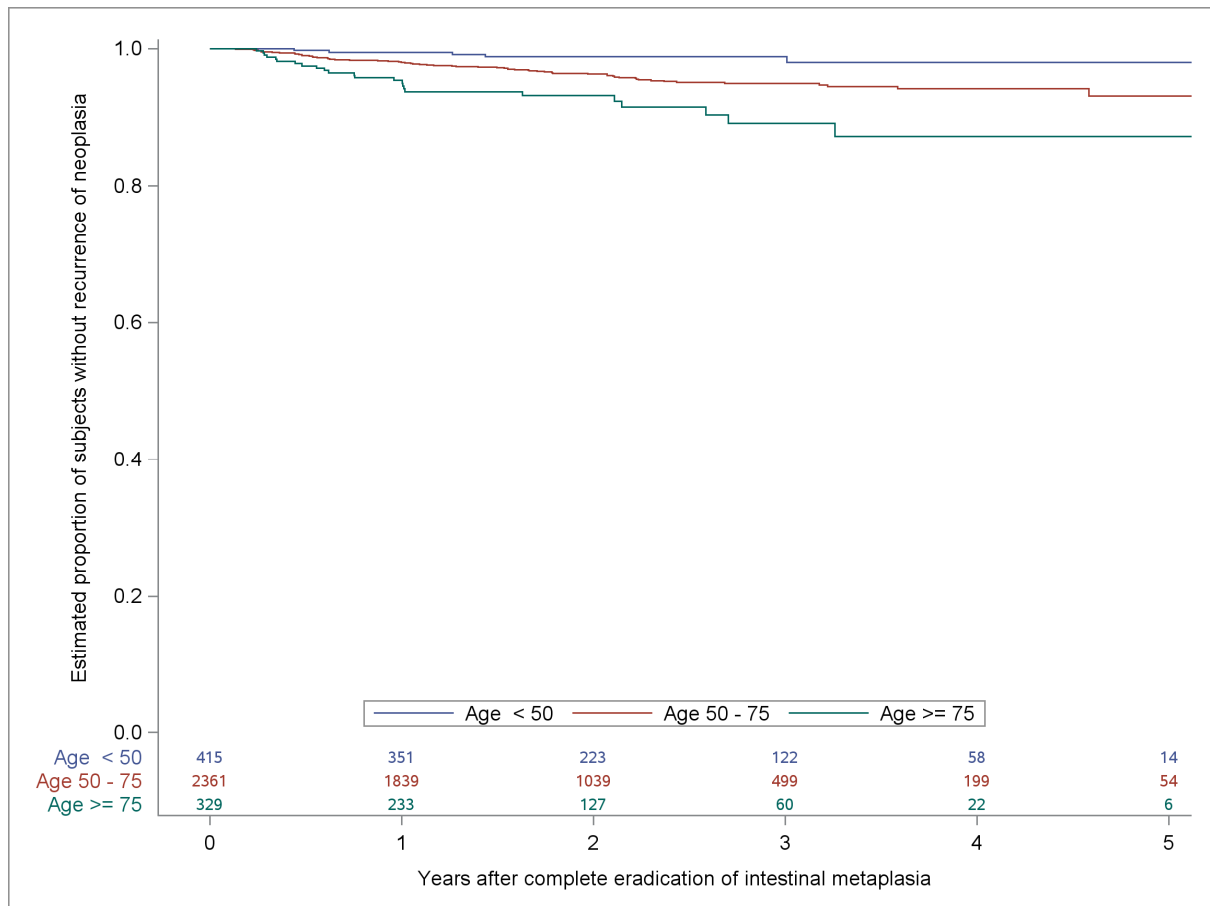

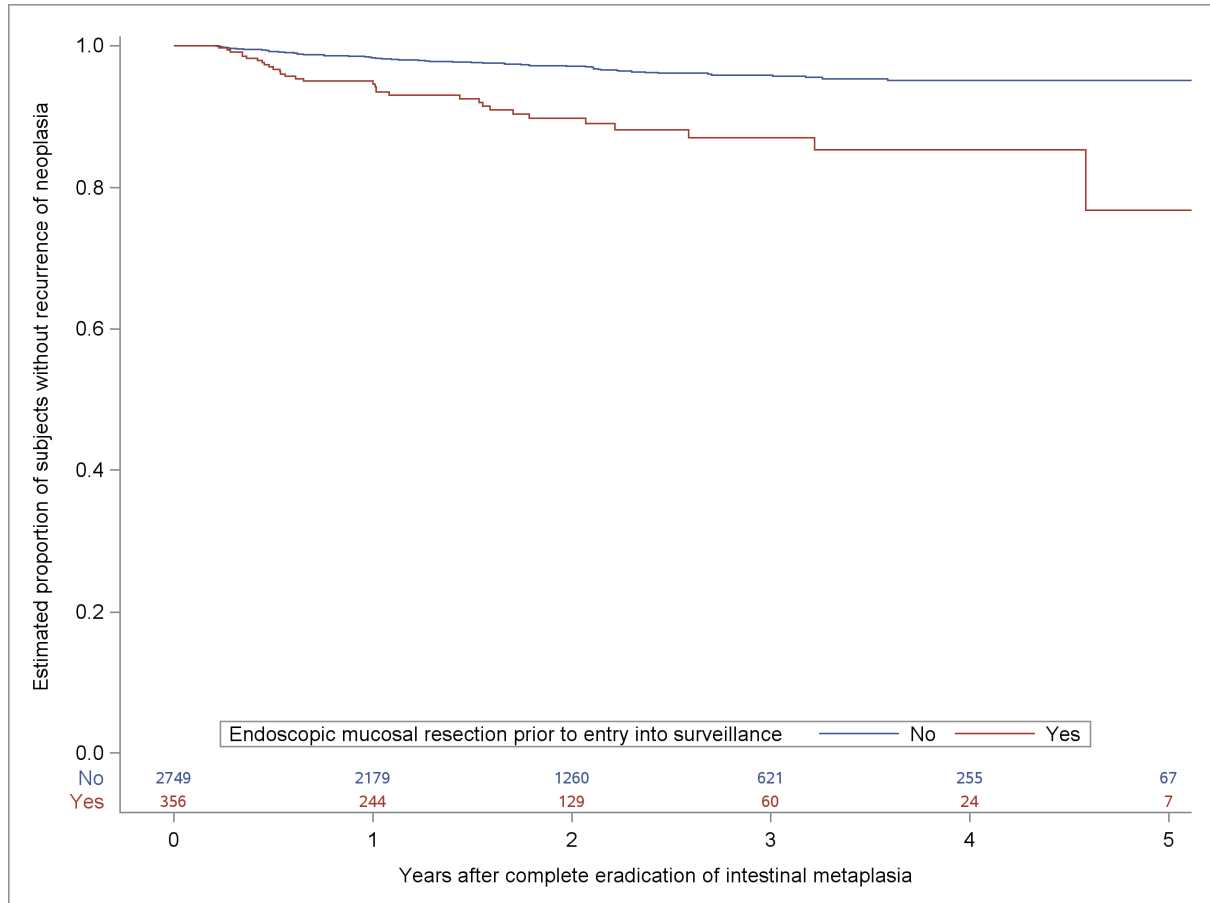



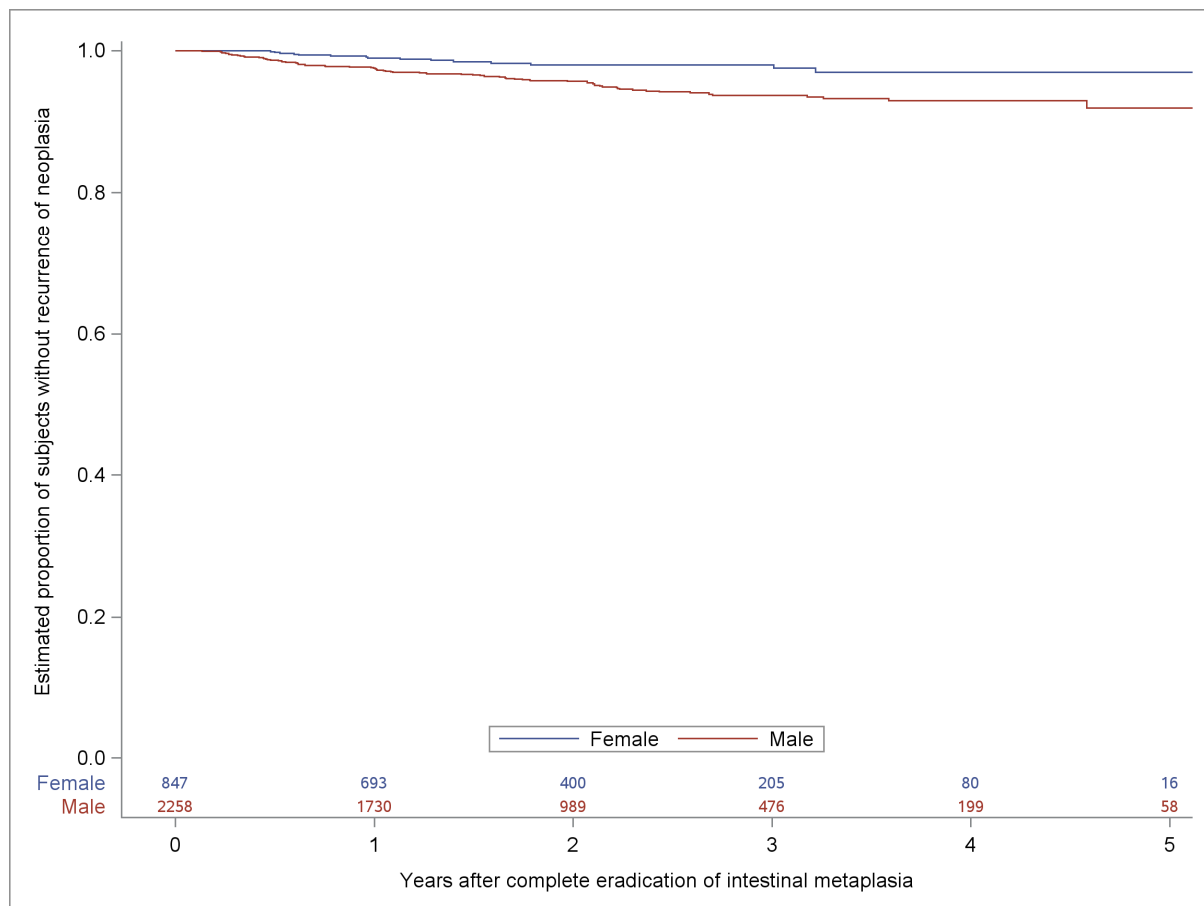

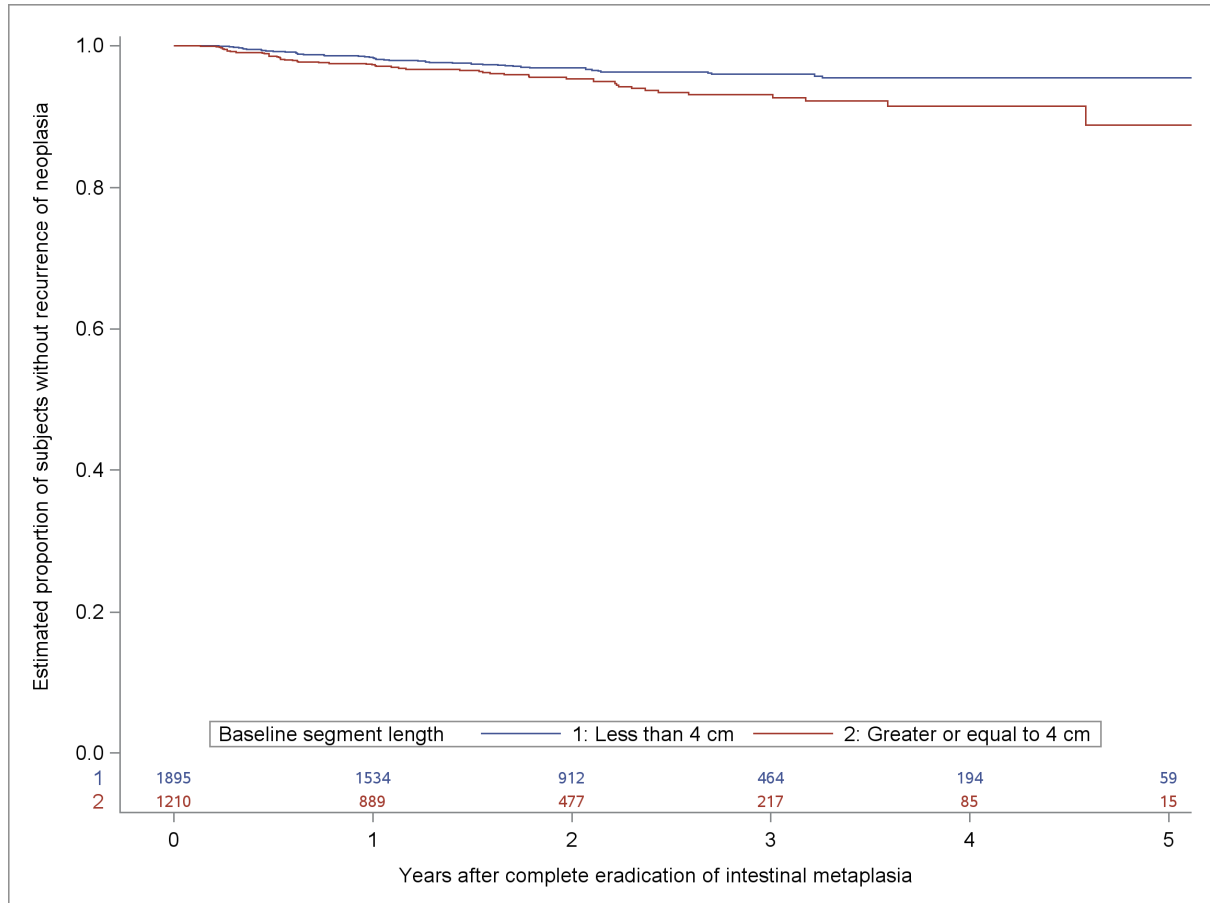

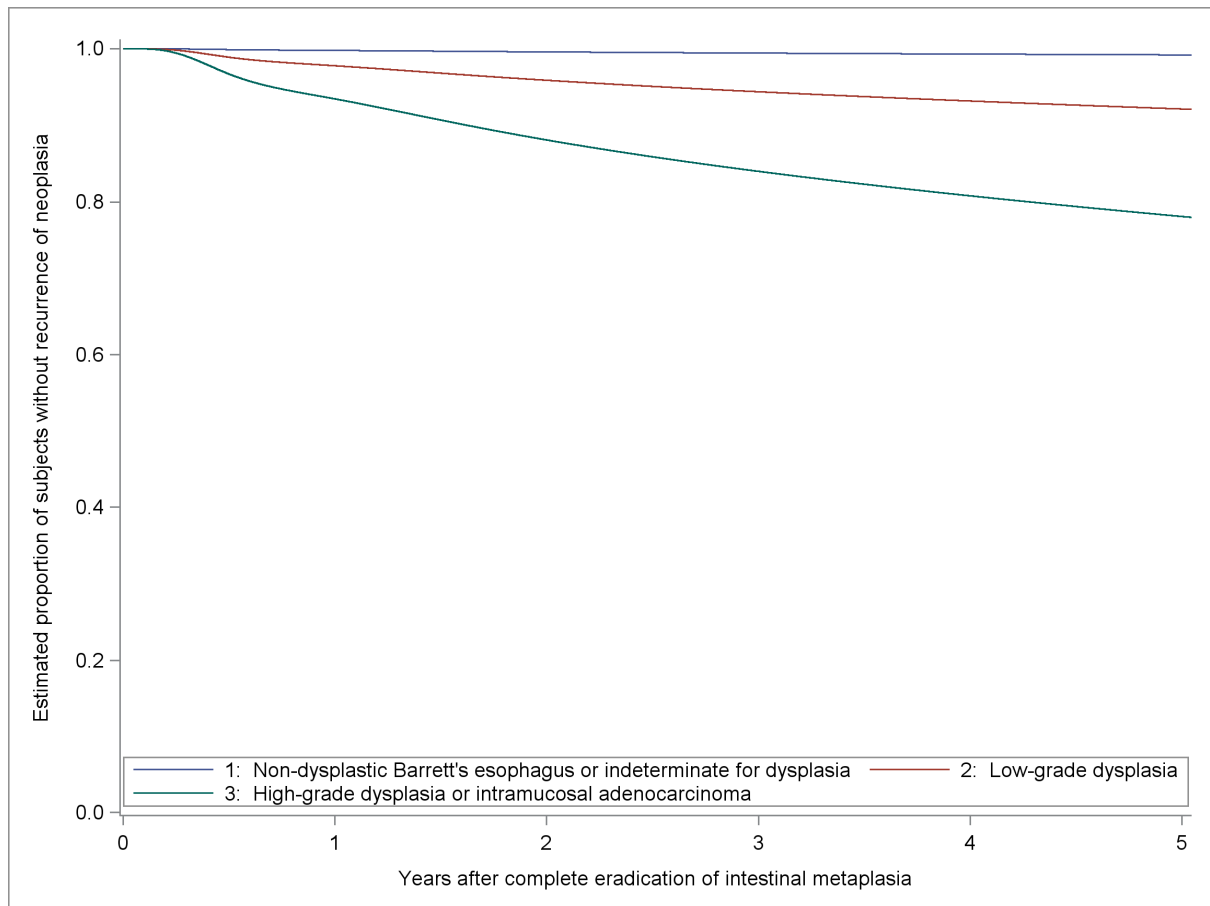

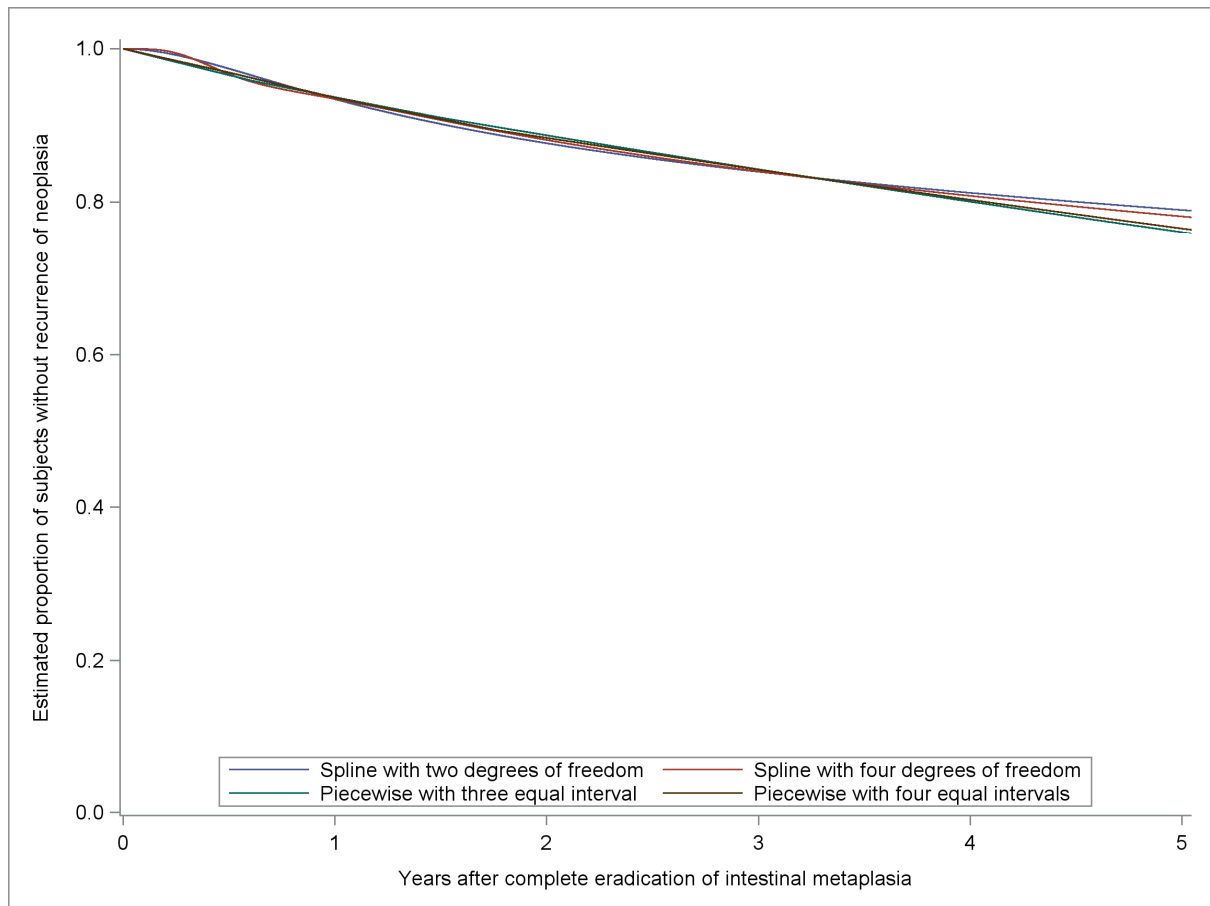

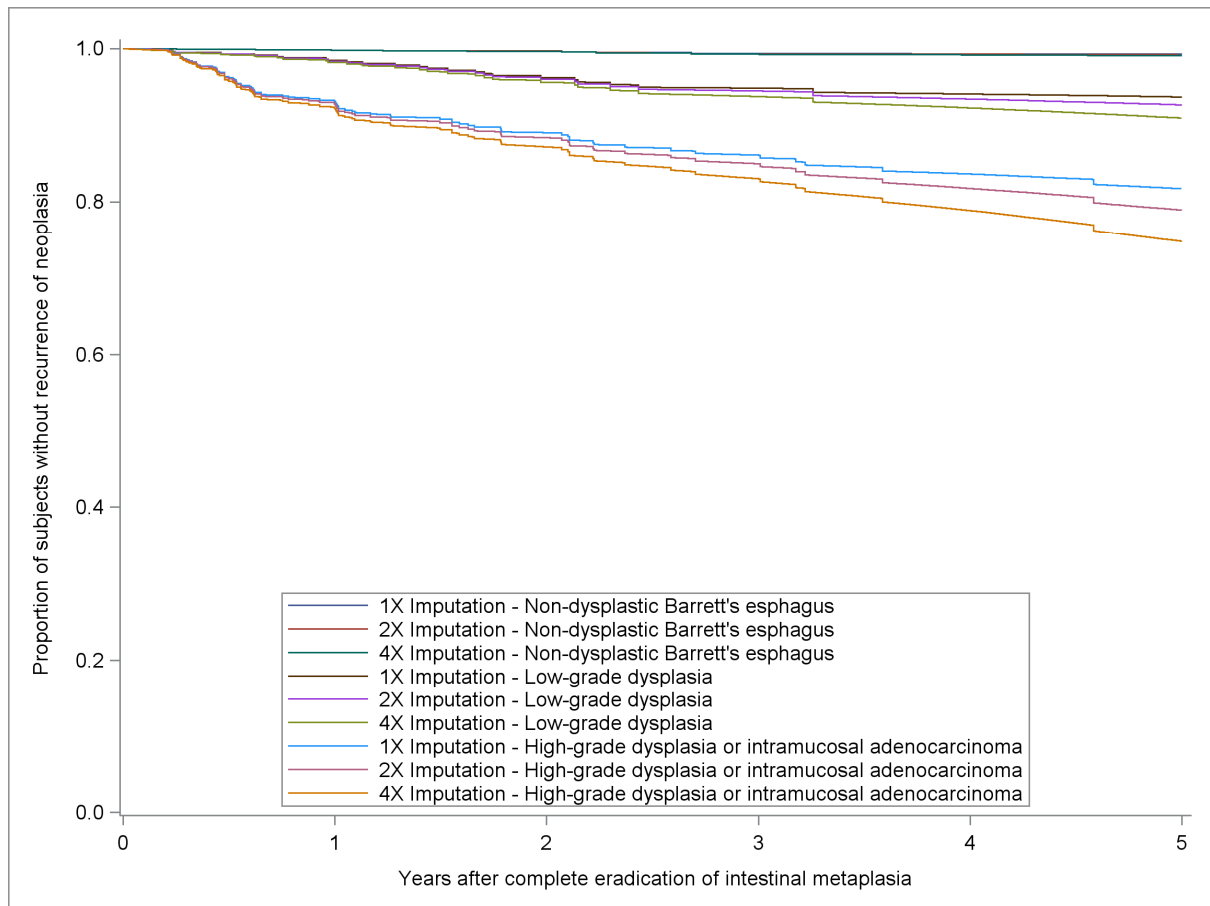

Supplement: NIHMS960016-supplement-supplement_1.pdf [file NIHMS960016-supplement-supplement_1.pdf]
